# Supplementary material for: HIF-1α hampers dendritic cell function and Th1 generation during chronic visceral leishmaniasis
Source: PubMed Central journal article supplement (PMC5823892; doi:10.1038/s41598-018-21891-z), 2018-02-22
Supplement: 41598_2018_21891_MOESM1_ESM.pdf [file 41598_2018_21891_MOESM1_ESM.pdf]

**“HIF-1 $\alpha$  hampers dendritic cell function and Th1 generation during chronic visceral leishmaniasis”**  
Akil Hammami, Belma Melda Abidin, Krista M. Heinonen, and Simona Stäger

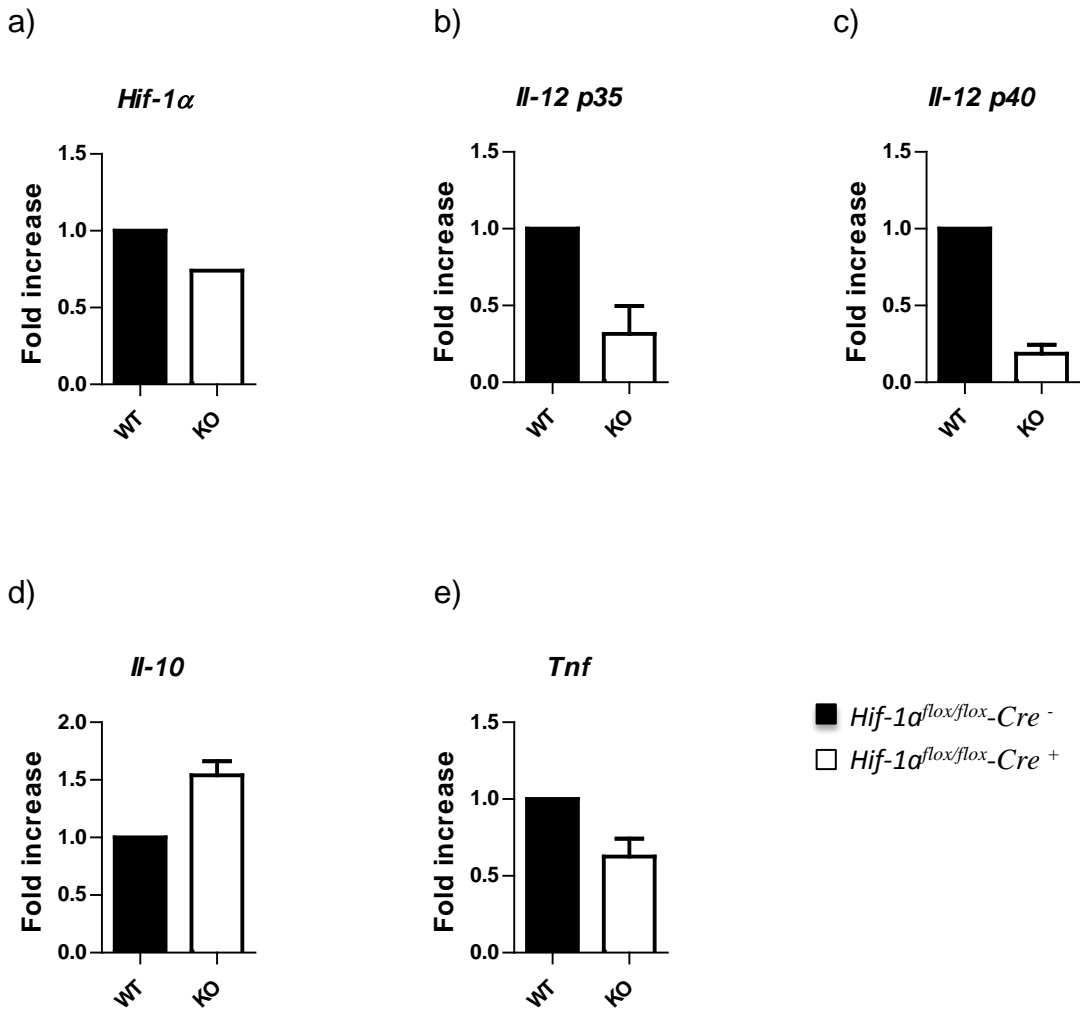

**Supplemental Figure 1.** Real-time PCR analysis of HIF-1 $\alpha$  (A), IL-12p35 (B), IL-12p40 (C), IL-10 (D), and TNF (E) expression in splenic DCs from naive *Hif-1 $\alpha$ <sup>flox/flox</sup>*Cd11c-Cre*<sup>-</sup> (WT) mice ( pool of 3 mice) and *Hif-1 $\alpha$ <sup>flox/flox</sup>*Cd11c-Cre*<sup>+</sup> (KO) naive mice.**
